# Supplementary material for: A family of GFP-like proteins with different spectral properties in lancelet Branchiostoma floridae
Source: Springer Nature journal article supplement (doi:10.1186/1745-6150-3-28), 2008-07-03
Supplement: Additional file 2 [file 1745-6150-3-28-s2.pdf]

|               | $\lambda_{\text{max}}$<br>Absorbance | $\lambda_{\text{max}}$<br>Emission | Molar Extinction<br>$\text{M}^{-1}\text{cm}^{-1}$ | QY    | Relative<br>Brightness |
|---------------|--------------------------------------|------------------------------------|---------------------------------------------------|-------|------------------------|
| <b>GFP</b>    | 490                                  | 510                                | 32000                                             | 76.16 | 1.00                   |
| <b>YFP</b>    | 516                                  | 528                                | 70000                                             | 73.38 | 2.11                   |
| <b>LanFP1</b> | 500                                  | 510                                | 53000                                             | 57    | 1.02                   |
| <b>LanFP2</b> | 500                                  | 516                                | 162000                                            | 0.13  | 0.01                   |
