# Supplementary material for: A family of GFP-like proteins with different spectral properties in lancelet Branchiostoma floridae
Source: Springer Nature journal article supplement (doi:10.1186/1745-6150-3-28), 2008-07-03
Supplement: Additional file 3 [file 1745-6150-3-28-s3.doc]

Murinized coding sequences for LanFP1 and 2:

LanFP1

atgcccctgcccgccacccacgacatccacctgcacggcagcatcaacggccacgagttcgacatggtgggcggcggcaagggcgaccccaacgccggcagcctggtgaccaccgccaagagcaccaagggcgccctgaagttcagcccctacctgatgatcccccacctgggctacggctactaccagtacctgccctaccccgacggccccagccccttccaggccagcatgctggagggcagcggctacgccgtgtaccgcgtgttcgacttcgaggacggcggcaagctgaccaccgagttcaagtacagctacgagggcagccacatcaaggccgacatgaagctgatgggcagcggcttccccgacgacggccccgtgatgaccagccagatcgtggaccaggacggctgcgtgagcaagaagacctacctgaacaacaacaccatcgtggacagcttcgactggagctacaacctgcagaacggcaagcgctaccgcgcccgcgtgagcagccactacatcttcgacaagcccttcagcgccgacctgatgaagaagcagcccgtgttcgtgtaccgcaagtgccacgtgaaggccagcaagaccgaggtgaccctggacgagcgcgagaaggccttctacgagctggccgga

lanFP2

atgagcctgcccaccacccacgacctgcacatcttcggcagcgtgaacggcgccgagttcgacctggtgggcggcggcaagggcaaccccaacgacggcaccctggagaccagcgtgaagagcacccgcggcgccctgccctgcagccccctgctgatcggccccaacctgggctacggcttctaccagtacctgcccttccccggcggcgccagccccttccagaccgccatcaccgacggcggctaccaggtgcaccgcgtgttcaagttcgaggacggcggcgtgctgagctgcaacttccgctacacctacgagggcggcaagatcaagggcgagttccagctgatcggcagcggcttccccgccggcggccccgtgatgagcggcggcctgaccaccctggaccgcagcgtggccaagctgcagtgcagcgacgactgcaccatcaccggcaccaacaactggagcttctgcaccaccgacggcaagcgccaccaggccgacgtgcagaccaactacaccttcgccaagcccctgcccgccggcctgaaggagaagatgcccatcttcctgggccaccagatcgaggtgaaggccagcaagaccgagatcaccctgagcgagaaggtgaaggccttcatcgacaccgtgggcagcggtaccgga
